# Supplementary material for: Spatial Temporal Dynamics and Molecular Evolution of Re-Emerging Rabies Virus in Taiwan
Source: PubMed Central journal article supplement (PMC4813248; doi:10.3390/ijms17030392), 2016-03-17
Supplement: ijms-17-00392-s001.pdf [file ijms-17-00392-s001.pdf]

# Supplementary Materials: Spatial Temporal Dynamics and Molecular Evolution of Re-Emerge Rabies Virus in Taiwan

Yung-Cheng Lin, Pei-Yu Chu, Mei-Yin Chang, Kuang-Liang Hsiao, Jih-Hui Lin and Hsin-Fu Liu

**Table S1.** The list of references strains used to phylogenetic and evolutionary analysis in this study.

| Rabies Virus Glycoprotein Gene |                          |             |              |               |      |
|--------------------------------|--------------------------|-------------|--------------|---------------|------|
| Accession                      | Isolate                  | Country     | Country Code | Host Species  | Year |
| AB683584                       | RV/NCR.PHL/2004/Z-04-522 | Philippines | PH           | Dog           | 2004 |
| AB563813                       | RV/NCR.PHL/2005/Z-05-396 | Philippines | PH           | Dog           | 2005 |
| AB563901                       | RV/R3.PHL/2008/TRa-086   | Philippines | PH           | Dog           | 2008 |
| EU086155                       | 04030PHI                 | Philippines | PH           | Human         | 2004 |
| AB563800                       | RV/NCR.PHL/2005/Z-05-009 | Philippines | PH           | Dog           | 2005 |
| AB563975                       | RV/CAR.PHL/2009/TRa-200  | Philippines | PH           | Dog           | 2009 |
| AB733962                       | RV/CAR.PHL/2010/TRa-289  | Philippines | PH           | Dog           | 2010 |
| AB564005                       | RV/R7.PHL/2009/TRa-239   | Philippines | PH           | Dog           | 2009 |
| AB563896                       | RV/R7.PHL/2008/TRa-080   | Philippines | PH           | Dog           | 2008 |
| AB564016                       | RV/R10.PHL/2009/TRa-252  | Philippines | PH           | Dog           | 2009 |
| AB563807                       | RV/R11.PHL/2005/Z-05-186 | Philippines | PH           | Dog           | 2005 |
| FJ959397                       | CTN-1                    | China       | CN           | Vaccine       | 1956 |
| DQ767896                       | CTN                      | China       | CN           | Dog           | 1957 |
| JQ699272                       | CGX0810D                 | China       | CN           | Dog           | 2008 |
| EU267747                       | Guizhou AI03             | China       | CN           | Dog           | 2004 |
| GU358653                       | GX4                      | China       | CN           | Dog           | 1994 |
| EU828654                       | GN07                     | China       | CN           | Dog           | 2007 |
| EU643590                       | HN10                     | China       | CN           | Human         | 2006 |
| JN936788                       | CZJ0803F                 | China       | CN           | Ferret Badger | 2008 |
| FJ712196                       | F04                      | China       | CN           | Ferret Badger | 2008 |
| GQ857468                       | 08ZL11                   | China       | CN           | Ferret Badger | 2008 |
| FJ719756                       | ZJ-LA                    | China       | CN           | Ferret Badger | 2008 |
| JQ946087                       | JX08-45CC                | China       | CN           | Ferret Badger | 2011 |
| GU647092                       | JX08-45                  | China       | CN           | Ferret Badger | 2008 |
| FJ719752                       | JX08-48                  | China       | CN           | Ferret Badger | 2008 |
| JQ950453                       | JX12-234                 | China       | CN           | Ferret Badger | 2012 |
| FJ719749                       | JX08-47                  | China       | CN           | Ferret Badger | 2008 |
| JQ950451                       | JX12-102                 | China       | CN           | Ferret Badger | 2012 |
| EU086129                       | 9913BIR                  | Myanmar     | MM           | Dog           | 1999 |
| AY257983                       | HM208                    | Thailand    | TH           | Human         | 2001 |
| DQ849069                       | N11                      | China       | CN           | Dog           | 1997 |
| AB052666                       | No.33                    | Thailand    | TH           | Dog           | 2000 |
| DQ849072                       | CQ92                     | China       | CN           | Dog           | 1992 |
| EU086151                       | 03003INDO                | Indonesia   | ID           | Dog           | 2003 |
| AB115921                       | SN01-23                  | Indonesia   | ID           | Dog           | 2001 |
| EU267744                       | Guangxi_YL66             | China       | CN           | Dog           | 2003 |
| EU267751                       | Guizhou Qx5              | China       | CN           | Dog           | 2004 |
| EU275240                       | Yunnan_Qj07              | China       | CN           | Dog           | 2007 |
| GQ857464                       | 09AF33                   | China       | CN           | Dog           | 2009 |
| EU267759                       | Henan Sq59               | China       | CN           | Dog           | 2004 |
| GQ857461                       | 09AF30                   | China       | CN           | Dog           | 2009 |
| EU267753                       | Henan Hb10               | China       | CN           | Dog           | 2004 |
| GQ857471                       | WJ                       | China       | CN           | Dog           | 1989 |
| EU267769                       | HunanXx33                | China       | CN           | Dog           | 2004 |
| JQ647510                       | WH11                     | China       | CN           | Donkey        | 2011 |
| EF643518                       | Hubei/Wuhan/070308       | China       | CN           | Buffalo       | 2007 |
| EU267762                       | Hunan DK13               | China       | CN           | Dog           | 2004 |
| EU267763                       | Hunan Wg12               | China       | CN           | Dog           | 2004 |
| GU233763                       | JX09-17(fb)              | China       | CN           | Ferret Badger | 2009 |
| FJ825132                       | D11                      | China       | CN           | Dog           | 2008 |
| FJ825133                       | F01                      | China       | CN           | Ferret Badger | 2008 |

|                                        |                |                |                     |                        |             |
|----------------------------------------|----------------|----------------|---------------------|------------------------|-------------|
| GQ857465                               | ZJCA1          | China          | CN                  | Dog                    | 2009        |
| FJ712194                               | D02            | China          | CN                  | Dog                    | 2008        |
| GQ857466                               | 08ZL01         | China          | CN                  | Dog                    | 2008        |
| FJ825131                               | D10            | China          | CN                  | Dog                    | 2008        |
| GQ857470                               | LH             | China          | CN                  | Dog                    | 2006        |
| EU267773                               | Jiangsu Wx1    | China          | CN                  | Dog                    | 2004        |
| EU267752                               | Hebi0(H)       | China          | CN                  | Human                  | 2007        |
| JQ423952                               | BJ2011E        | China          | CN                  | Equine                 | 2011        |
| EU549783                               | BD06           | China          | CN                  | Dog                    | 2008        |
| DQ076097                               | SKRBV0404HC    | Korea          | KR                  | Cattle                 | 2004        |
| GU937024                               | KRVR0906       | Korea          | KR                  | Raccoon dog            | 2009        |
| DQ076102                               | SKRRD9902PJ    | Korea          | KR                  | Raccoon dog            | 1999        |
| FJ415313                               | NeiMeng925     | China          | CN                  | Raccoon dog            | 2008        |
| EF437215                               | NNV-RAB-H      | India          | IN                  | Human                  | 2006        |
| KC737850                               | A11-5300       | USA            | US                  | Human                  | 2011        |
| AB276311                               | BRhm528        | Brazil         | BR                  | Human                  | 1997        |
| AB276308                               | BRdg101        | Brazil         | BR                  | Dog                    | 2001        |
| AB085828                               | HEP-Flury      | Japan          | JP                  | Vaccine                | 2003        |
| DQ875050                               | MRV            | China          | CN                  | Rat                    | 1987        |
| AB128149                               | Ni-CE          | Japan          | JP                  | Vaccine                | 2007        |
| M13215                                 | PV             | France         | FR                  | Vaccine                | 1993        |
| EF206707                               | ERV            | USA            | US                  | Vaccine                | 1978        |
| M31046                                 | SAD B19        | USA            | US                  | Vaccine                | 1990        |
| EU267745                               | Guizhou A10(H) | China          | CN                  | Human                  | 2004        |
| AF499686                               | SRV9           | China          | CN                  | Vaccine                | 2006        |
| JQ685957                               | OR8767         | USA            | US                  | Gray fox               | 2009        |
| JQ685922                               | TN186          | USA            | US                  | Bat                    | 2005        |
| AY705373                               | SHBRV-18       | USA            | US                  | Bat                    | 1996        |
| JQ685950                               | A093504        | USA            | US                  | Bat                    | 2009        |
| JQ685953                               | 3645DR         | Mexico         | MX                  | Human                  | 2009        |
| AB276315                               | BRhm671        | Brazil         | BR                  | Human                  | 2005        |
| KF501174                               | TW-1614        | Taiwan         | TW                  | Formosan Ferret Badger | 2013        |
| KF501175                               | TW-1680        | Taiwan         | TW                  | Formosan Ferret Badger | 2013        |
| KF501176                               | TW-1682        | Taiwan         | TW                  | Formosan Ferret Badger | 2013        |
| KF501177                               | TW-1683        | Taiwan         | TW                  | Formosan Ferret Badger | 2013        |
| KF501178                               | TW-1685        | Taiwan         | TW                  | Formosan Ferret Badger | 2013        |
| KF501179                               | TW-1694        | Taiwan         | TW                  | Formosan Ferret Badger | 2013        |
| N/A                                    | TW-1706        | Taiwan         | TW                  | Formosan Ferret Badger | 2013        |
| KP881359                               | TW-1907        | Taiwan         | TW                  | Formosan Ferret Badger | 2013        |
| KP881360                               | TW-1944        | Taiwan         | TW                  | Formosan Ferret Badger | 2013        |
| KP881357                               | TW-1955        | Taiwan         | TW                  | Formosan Ferret Badger | 2013        |
| <b>Rabies Virus Nucleoprotein Gene</b> |                |                |                     |                        |             |
| <b>Accession</b>                       | <b>Isolate</b> | <b>Country</b> | <b>Country Code</b> | <b>Host Species</b>    | <b>Year</b> |
| HM486368                               | CGZ0508D       | China          | CN                  | Dog                    | 2005        |
| DQ666290                               | Guizhou_A103   | China          | CN                  | Dog                    | 2004        |
| DQ866121                               | GXWxp          | China          | CN                  | Dog                    | 2006        |
| EU159398                               | nu             | China          | CN                  | Human                  | 1986        |
| EU086182                               | 02046CHI       | China          | CN                  | Dog                    | 1994        |
| EU159386                               | GX4            | China          | CN                  | Dog                    | 1994        |
| DQ866105                               | GX01           | China          | CN                  | Dog                    | 2006        |
| DQ866116                               | GXLA           | China          | CN                  | Dog                    | 2003        |
| DQ866120                               | GXSL           | China          | CN                  | Dog                    | 2004        |
| EU643590                               | HN10           | China          | CN                  | Human                  | 2006        |
| EU828653                               | GN07           | China          | CN                  | Dog                    | 2007        |
| FJ712196                               | F04            | China          | CN                  | Ferret Badger          | 2008        |
| FJ598135                               | ZJ-LA          | China          | CN                  | Ferret Badger          | 2008        |
| JQ946087                               | JX08-45CC      | China          | CN                  | Ferret Badger          | 2011        |
| FJ719753                               | Jx08-48        | China          | CN                  | Ferret Badger          | 2008        |
| GU647092                               | JX08-45        | China          | CN                  | Ferret Badger          | 2008        |
| FJ719751                               | Jx08-47        | China          | CN                  | Ferret Badger          | 2008        |
| JQ950452                               | Jx12-234       | China          | CN                  | Ferret Badger          | 2012        |
| JQ950448                               | JX12-67        | China          | CN                  | Ferret Badger          | 2012        |
| FJ959397                               | CTN-1          | China          | CN                  | Vaccine                | 1956        |

|                                         |                    |                |                     |                        |             |
|-----------------------------------------|--------------------|----------------|---------------------|------------------------|-------------|
| HM486380                                | CSD0614D           | China          | CN                  | Dog                    | 2006        |
| DQ787145                                | CTN                | China          | CN                  | Vaccine                | 1957        |
| EU086205                                | 04030PHI           | Philippines    | PH                  | Dog                    | 2004        |
| AY103004                                | 94273PHI           | Philippines    | PH                  | Human                  | 1994        |
| EU275243                                | Yunnan_Tc06        | China          | CN                  | Dog                    | 2006        |
| FJ594278                                | N11                | China          | CN                  | Dog                    | 1997        |
| JN786877                                | QS-05              | Thailand       | TH                  | Dog                    | 2012        |
| EU086206                                | 8734THA            | Thailand       | TH                  | Human                  | 1983        |
| EU086171                                | 9916CBG            | Cambodia       | KH                  | Dog                    | 1999        |
| EU086209                                | 01016VNM           | Viet Nam       | VN                  | Dog                    | 2001        |
| EU086210                                | 01017VNM           | Viet Nam       | VN                  | Dog                    | 2001        |
| EU086192                                | 03003INDO          | Indonesia      | ID                  | Dog                    | 2003        |
| EU275245                                | Yunnan_Qj07        | China          | CN                  | Dog                    | 2007        |
| EU159401                                | WJ                 | China          | CN                  | Dog                    | 1989        |
| HQ118110                                | ZJD8               | China          | CN                  | Dog                    | 2008        |
| JQ647510                                | WH11               | China          | CN                  | Donkey                 | 2011        |
| EF611081                                | hubei070308        | China          | CN                  | Buffalo                | 2007        |
| GU233765                                | JX09-17-FB         | China          | CN                  | Ferret Badger          | 2009        |
| EU828657                                | WJ07-1             | China          | CN                  | Dog                    | 2007        |
| EU549783                                | BD06               | China          | CN                  | Dog                    | 2008        |
| EU828655                                | GC07               | China          | CN                  | Dog                    | 2007        |
| EU267777                                | Hebei0(H)          | China          | CN                  | Human                  | 2007        |
| EF556197                                | Zhejiang Wz0(H)    | China          | CN                  | Human                  | 2006        |
| JQ685957                                | OR8767             | USA            | US                  | Gray fox               | 2009        |
| GU644982                                | TN186              | USA            | US                  | Bat                    | 2005        |
| AY705373                                | SHBRV-18           | USA            | US                  | Bat                    | 1996        |
| JQ685950                                | A093504            | USA            | US                  | Bat                    | 2009        |
| AF351849                                | STTEX              | USA            | US                  | Bat                    | 1994        |
| JQ685953                                | 3645DR             | Mexico         | MX                  | Human                  | 2009        |
| KC758862                                | ARGA795_2007       | USA            | US                  | Bat                    | 2007        |
| AY877435                                | V920               | Mexico         | MX                  | Bat                    | 1993        |
| GU937036                                | KRVR0901           | Korea          | KR                  | Raccoon dog            | 2009        |
| DQ076130                                | SKRBV0404HC        | Korea          | KR                  | Cattle                 | 2004        |
| DQ076124                                | SKRDG0203CW        | Korea          | KR                  | Dog                    | 2002        |
| EF437215                                | NNV-RAB-H          | India          | IN                  | Human                  | 2006        |
| AY352493                                | RV61               | India          | IN                  | Human                  | 1987        |
| L20672                                  | Ontario            | Canada         | CA                  | Ontario fox            | 1996        |
| AY352486                                | 3510w              | Russian        | RU                  | Wolf                   | 1995        |
| AY352462                                | RVHK               | Russian        | RU                  | Human                  | 1998        |
| EU853594                                | Guinea             | Guinea         | GN                  | Dog                    | 1993        |
| AY854593                                | V684               | Mexico         | MX                  | skunk                  | 1992        |
| AB128149                                | Ni-CE              | Japan          | JP                  | Vaccine                | 2007        |
| AB044824                                | Nishigahara        | Japan          | JP                  | Vaccine                | 2000        |
| EF206715                                | SAD P5/88(Rabifox) | USA            | US                  | Vaccine                | 2001        |
| AF499686                                |                    | USA            | US                  | Vaccine                | 2006        |
| EF206707                                | ERA                | France         | FR                  | Vaccine                | 1978        |
| AF357308                                | PV                 | France         | FR                  | Vaccine                | 1993        |
| AB085828                                | HPE-Flury          | Japan          | JP                  | Vaccine                | 2003        |
| DQ875050                                | MRV                | China          | CN                  | Rat                    | 1987        |
| KF501180                                | TW-1614            | Taiwan         | TW                  | Formosan Ferret Badger | 2013        |
| KF501181                                | TW-1680            | Taiwan         | TW                  | Formosan Ferret Badger | 2013        |
| KF501182                                | TW-1682            | Taiwan         | TW                  | Formosan Ferret Badger | 2013        |
| KF501183                                | TW-1683            | Taiwan         | TW                  | Formosan Ferret Badger | 2013        |
| KF501184                                | TW-1685            | Taiwan         | TW                  | Formosan Ferret Badger | 2013        |
| KF501185                                | TW-1694            | Taiwan         | TW                  | Formosan Ferret Badger | 2013        |
| N/A                                     | TW-1749            | Taiwan         | TW                  | Formosan Ferret Badger | 2013        |
| KP881356                                | TW-1944            | Taiwan         | TW                  | Formosan Ferret Badger | 2013        |
| <b>Rabies Virus Matrix Protein Gene</b> |                    |                |                     |                        |             |
| <b>Accession</b>                        | <b>Isolate</b>     | <b>Country</b> | <b>Country Code</b> | <b>Host Species</b>    | <b>Year</b> |
| GU358653                                | GX4                | China          | CN                  | Dog                    | 1994        |
| GQ472533                                | GXWX               | China          | CN                  | Pig                    | 2005        |
| GQ472507                                | GX01               | China          | CN                  | Dog                    | 2004        |
| EU643590                                | HN10               | China          | CN                  | Human                  | 2006        |

|          |                     |            |    |                        |      |
|----------|---------------------|------------|----|------------------------|------|
| FJ959397 | CTN-1               | China      | CN | Vaccine                | 1956 |
| FJ712195 | F02                 | China      | CN | Ferret Badger          | 2008 |
| FJ719757 | ZJ-LA               | China      | CN | Ferret Badger          | 2008 |
| FJ719754 | JX08-58             | China      | CN | Ferret Badger          | 2008 |
| GU647092 | JX08-45             | China      | CN | Ferret Badger          | 2008 |
| JQ946087 | JX08-45CC           | China      | CN | Ferret Badger          | 2011 |
| FJ719750 | JX08-47             | China      | CN | Ferret Badger          | 2008 |
| JQ647510 | WH11                | China      | CN | Donkey                 | 2011 |
| GU233764 | JX09-17(fb)         | China      | CN | Ferret Badger          | 2009 |
| FJ719759 | ZJ-QZ               | China      | CN | Dog                    | 2008 |
| EU549783 | BD06                | China      | CN | Dog                    | 2008 |
| FJ032326 | D02                 | China      | CN | Dog                    | 2008 |
| EU293100 | 8764THA             | Thailand   | TH | Human                  | 1983 |
| EU293107 | 8743THA             | Thailand   | TH | Human                  | 1983 |
| JN786877 | QS-05               | Thailand   | TH | Dog                    | 2012 |
| AB699220 | BDR5                | Bangladesh | BD | Goat                   | 2010 |
| KF154996 | RV61                | India      | IN | Human                  | 1987 |
| EF437215 | NNV-RAB-H           | India      | IN | Human                  | 2006 |
| KC171644 | BD0406CC            | Korea      | KR | Raccoon dog            | 2004 |
| KC171645 | BV9901PJ            | Korea      | KR | Raccoon dog            | 1999 |
| AB291107 | BR-Pfx6             | Brazil     | BR | Gray fox               | 2002 |
| AB085828 | HPE-Flury           | Japan      | JP | Vaccine                | 2003 |
| DQ875050 | MRV                 | China      | CN | Rat                    | 1987 |
| JQ977406 | 1352KRA             | Russian    | RU | Dog                    | 2008 |
| EU307994 | CVS                 | India      | IN | Dog                    | 1988 |
| EF206707 | ERA                 | France     | FR | Vaccine                | 1978 |
| EF206715 | SAD P5/88 (Rabifox) | USA        | US | Vaccine                | 2001 |
| FJ032330 | F01                 | China      | CN | Ferret Badger          | 2008 |
| AB128149 | Ni-CE               | Japan      | JP | Vaccine                | 2007 |
| AB044824 | Nishigahara         | Japan      | JP | Vaccine                | 2000 |
| AF360857 | NYRAC; NY516        | USA        | US | Procyon lotor          | 1997 |
| JQ685953 | 3645DR              | Mexico     | MX | Human                  | 2009 |
| JQ685957 | OR8767              | USA        | US | Gray Fox               | 2009 |
| JQ685950 | A093504             | USA        | US | Bat                    | 2009 |
| JQ685922 | TN186               | USA        | US | Bat                    | 2005 |
| KF544960 | TW-1614             | Taiwan     | TW | Formosan Ferret Badger | 2013 |
| KF544961 | TW-1680             | Taiwan     | TW | Formosan Ferret Badger | 2013 |
| KF544962 | TW-1682             | Taiwan     | TW | Formosan Ferret Badger | 2013 |
| KF544963 | TW-1683             | Taiwan     | TW | Formosan Ferret Badger | 2013 |
| KF544964 | TW-1685             | Taiwan     | TW | Formosan Ferret Badger | 2013 |
| KF544965 | TW-1694             | Taiwan     | TW | Formosan Ferret Badger | 2013 |
| N/A      | TW-1706             | Taiwan     | TW | Formosan Ferret Badger | 2013 |
| N/A      | TW-1749             | Taiwan     | TW | Formosan Ferret Badger | 2013 |
| N/A      | TW-1879             | Taiwan     | TW | Formosan Ferret Badger | 2013 |
| N/A      | TW-1944             | Taiwan     | TW | Formosan Ferret Badger | 2013 |

Abbreviations: BD: Bangladesh; BR: Brazil; CA: Canada; CN: China; FR: France; GN: Guinea; ID: Indonesia; IN: India; JP: Japan; KH: Cambodia; KR: Korea; MM: Myanmar; MX: Mexico; PH: Philippines; RU: Russian; TH: Thailand; TW: Taiwan; US: United States of America (USA); VN: Viet Nam.
